# Supplementary material for: Efficient photovoltaic devices based on p-ZnSe/n-CdS core–shell heterojunctions with high open-circuit voltage
Source: Royal Society of Chemistry journal article supplement (doi:10.1039/c6tc04960e), 2017-01-01
Supplement: c6tc04960e1.pdf [file c6tc04960e1.pdf]

### Supporting Information

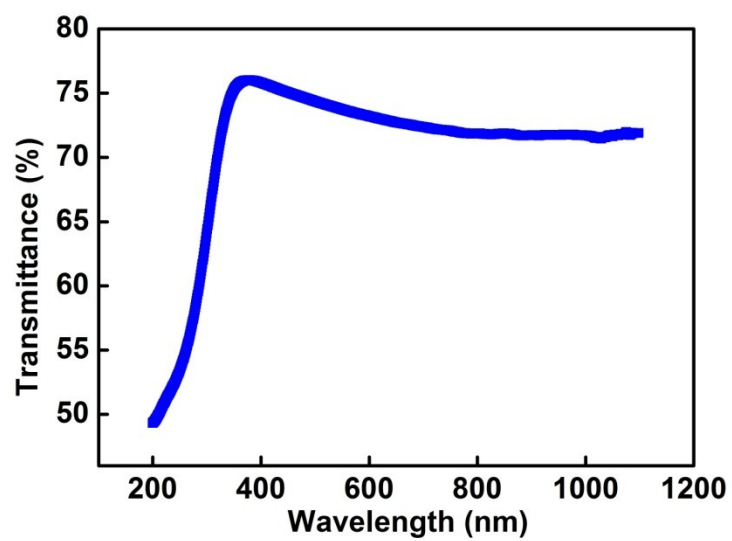

Figure. S1 Transmittance of 15 nm Ti layer.

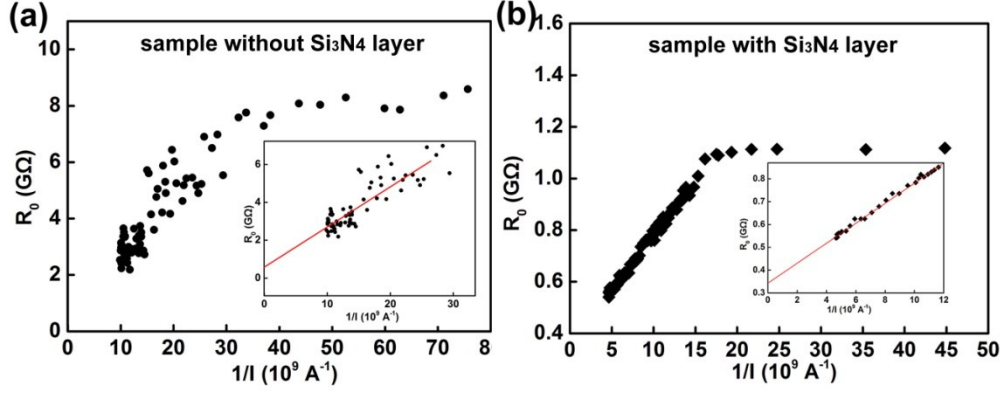

Figure. S2 The differential resistance  $R_0$  as a function of forward current  $1/I$ .

The I-V curves of the heterojunction in the dark are considered to be fitted well by the modified Shockley equation:

$$I = I_0 \left\{ \exp[\beta(V - IR_s)] - 1 \right\} + \frac{V - IR_s}{R_{sh}} \quad (S1)$$

Where:  $I_0$  is the reverse saturation current,  $R_s$  is the series resistance and  $R_{sh}$  is the shunt resistance.  $\beta = q/nkT$ , where  $q$  is the electronic charge,  $n$  is the diode quality factor,  $k$  is the Boltzmann constant, and  $T$  is the absolute temperature.

From equation (S1), the junction differential resistance,  $R_0$ , can be given by:

$$R_0 = \frac{dV}{dI} = R_s + \frac{1}{\beta I_0 \exp[\beta(V - IR_s)] + 1/R_{sh}} \quad (S2)$$

For higher forward bias, where  $R_s$  affects the curves, equation (S1) can be approximated as  $I = I_0 \exp[\beta(V - IR_s)]$ , and since  $1/R_{sh} < \beta I$ , equation (S2) can be written as follows:

$$R_0 \cong R_s + 1/\beta I \quad (S3)$$

Thus, by plotting  $R_0$  vs  $1/I$  for high forward bias, shown in Figure. (S1), the value for  $R_s$  and  $n$  parameters can be extracted.

At low voltages, where the current flowing through  $R_{sh}$  becomes important, and equation (S2) becomes:

$$R_0 \cong R_s + R_{sh} \quad (S4)$$

Usually,  $R_s \ll R_{sh}$ , and  $R_0$  thus approaches  $R_{sh}$  at low bias.

The graph of  $R_0$  vs  $1/I$  is shown in Figure. S2. As a result, the values of  $n$ ,  $R_s$  and  $R_{sh}$  are 8.1, 550 M $\Omega$  and 8 G $\Omega$  for the heterojunction without Si<sub>3</sub>N<sub>4</sub> layer while these values are 1.65, 350 M $\Omega$  and 1.1 G $\Omega$  for the heterojunction with Si<sub>3</sub>N<sub>4</sub> layer.

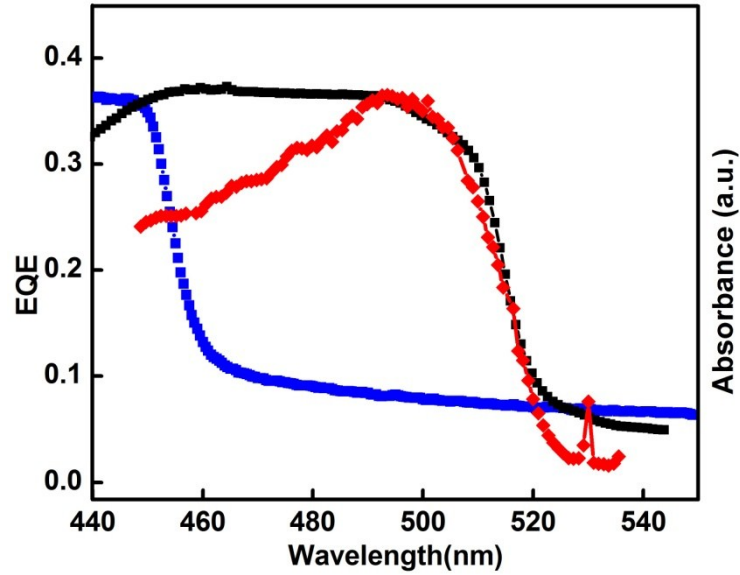

Figure. S3 EQE spectrum of the p-ZnSe/n-CdS core-shell heterojunction solar cells and the absorption spectrum of CdS and ZnSe. It is noted that the EQE spectrum shows the maximum EQE value of ~ 37% located at ~ 495 nm and indicates that CdS film has major contribution in the heterojunction solar cells.

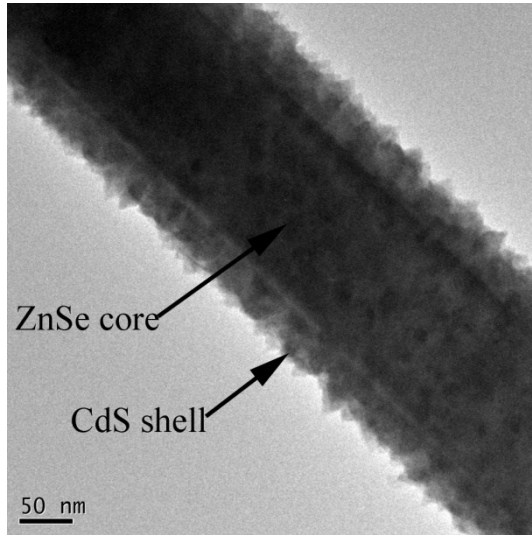

Figure S4. TEM image of a ZnSe/CdS core-shell heterojunction. The TEM image showed that there was a sharp distinction in the contrast along the radial direction of the nanowire, which revealed that its core-shell structure.
